# Supplementary material
Source: publisher figshare collection journal article supplement (https://sage.figshare.com/ndownloader/files/40903410)
Supplement: Supplementary file 1 [file 40903410]

**Supplementary Fig. 11** Schematic diagram of the variation of magnetic force with current

**Supplementary Fig. 12** Magnetic induction strength measurement

**Supplementary Fig. 13** Schematic diagram of magnetic module partitioning

**Supplementary Table 1**

Magnetic induction intensity distribution at measurement points (mT)

|  |  | 0 | 1 | 2 | 3 | 4 | 5 | 6 | 7 | 8 |
| --- | --- | --- | --- | --- | --- | --- | --- | --- | --- | --- |
| Module 1 | Area 1 | 51.1 | 50.2 | 49.5 | 49.6 | 49.8 | 49.2 | 50.4 | 49.6 | 51.5 |
| Area 2 |  | 70.8 | 57.3 | 60.0 | 57.3 | 72.5 | 67.6 | 83.6 | 75.6 |
| Area 3 |  | 366.9 | 185.3 | 205.5 | 164.3 | 380.5 | 378.5 | 397.3 | 376.1 |
| Module 2 | Area 1 | -50.2 | -51.2 | -51.6 | -51.5 | -52.4 | -52.6 | -53.2 | -50.3 | -52.4 |
| Area 2 |  | -73.5 | -61.8 | -63.5 | -58.9 | -58.7 | -54.6 | -68.5 | -74.8 |
| Area 3 |  | -398.8 | -370.0 | -378.1 | -144.9 | -168.0 | -153.3 | -367.4 | -372.5 |
| Module 3 | Area 1 | 51.2 | 51.9 | 51.6 | 51.8 | 52.6 | 51.3 | 53.4 | 53.4 | 51.7 |
| Area 2 |  | 59.9 | 55.8 | 67.8 | 66.5 | 77.1 | 70.6 | 77.7 | 58.9 |
| Area 3 |  | 200.4 | 193.6 | 370.8 | 376.8 | 391.4 | 353.4 | 365.1 | 165.6 |
| Module 4 | Area 1 | -51.4 | -52.3 | -52.6 | -51.4 | -52.1 | -51.8 | -51.8 | -51.9 | -51.2 |
| Area 2 |  | -63.7 | -68.9 | -71.7 | -64.6 | -63.9 | -54.5 | -64.2 | -59.1 |
| Area 3 |  | -401.2 | -387.3 | -363.2 | -374.2 | -369.8 | -163.1 | -178.6 | -173.2 |

**Supplementary Fig.14** Model of vehicle-mounted active magnetic system

**Supplementary Fig. 15** Force condition of tower equipment transportation

**Supplementary Fig. 16** Diagram of axial tipping of transported equipment

**Supplementary Fig. 17** Diagram of lateral tipping of transported equipment

**Supplementary Fig. 18** Diagram of saddle loads
